# Supplementary material
Source: publisher figshare collection journal article supplement (https://frontiersin.figshare.com/ndownloader/files/12884600)
Supplement: Supplementary file [file 12884600]

A.

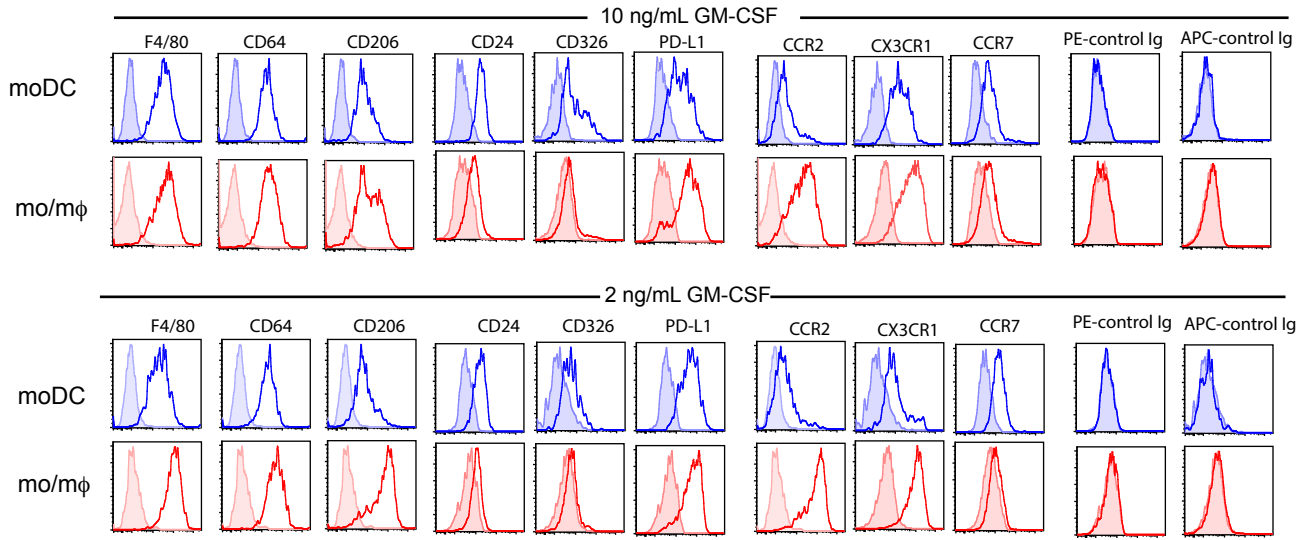

B.

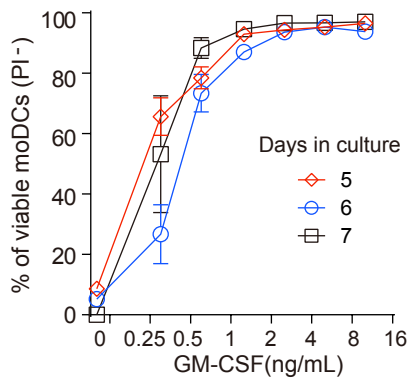

### Supplementary Figure 2:

A. GM-CSF doses impact on DC generation in vitro. BM cells were cultured with high (10 ng/mL) and low dose (2 ng/mL) of GM-CSF for 7 days. Cultures were harvested and analyzed for cell composition. Gated moDCs (CD11b<sup>lo</sup>MHC<sup>hi</sup>) and mo/mφ (CD11b<sup>hi</sup>MHC<sup>lo</sup>) were shown for expression of various myeloid markers. Shade area represents FMO controls.

B. The survival of moDCs is not affected by the doses of GM-CSF. Bone marrow cells were cultured in the presence of increasing concentration of GM-CSF indicated. The viability of moDCs in the cultures were examined by FACS from day 5 to day 7, and plotted as histogram.
